# Supplementary material for: Pillared cobalt–organic framework with an unprecedented (3,4,6)-connected architecture showing the coexistence of spin canting and long-range magnetic ordering
Source: Royal Society of Chemistry journal article supplement (doi:10.1039/b911950g), 2009-09-15
Supplement: b911950g.pdf [file b911950g.pdf]

# Pillared Cobalt–Organic Framework with an Unprecedented (3, 4, 6)-Connected Architecture Showing the Coexistence of Spin Canting and Long-Range Magnetic Ordering

Fu-Ping Huang, Jin-Lei Tian, Dong-Dong Li, Gong-Jun Chen, Wen Gu, Shi-Ping Yan\*, Xin Liu, Dai-Zheng Liao, Peng Cheng

Department of Chemistry,  
Nankai University, Tianjin 300071,  
P R China. E-mail: [yansp@nankai.edu.cn](mailto:yansp@nankai.edu.cn)

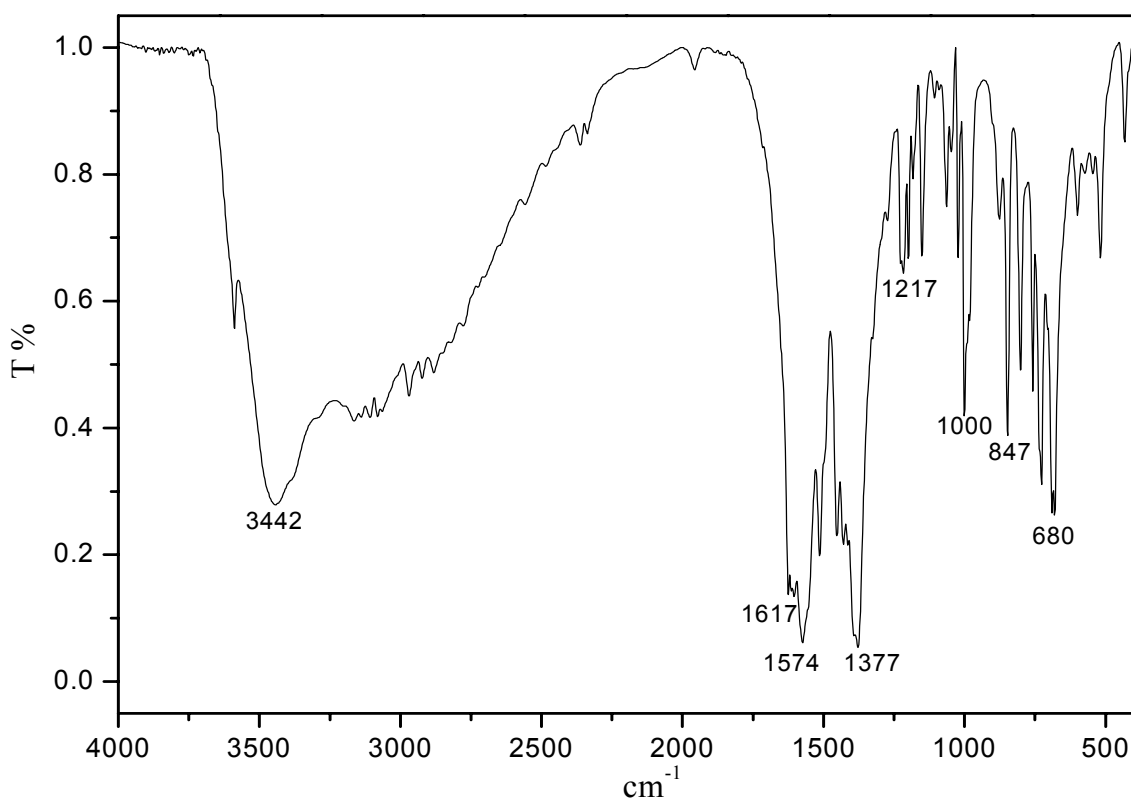

Figure S1. The IR spectra of complex 1

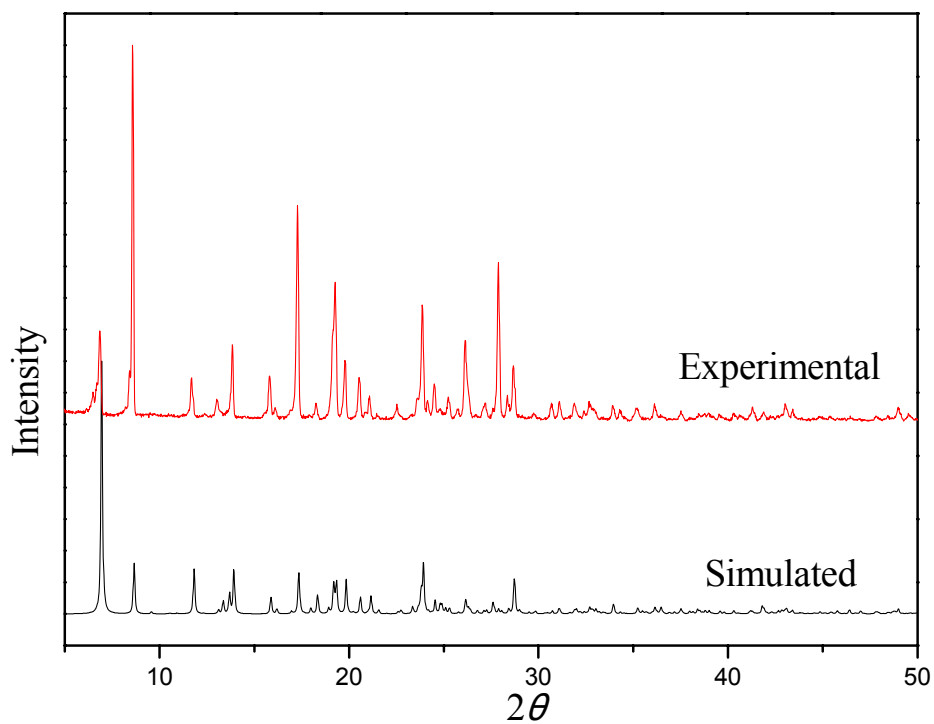

**Figure S2.** Measured and calculated X-ray powder diffraction (XRD) pattern of **1**

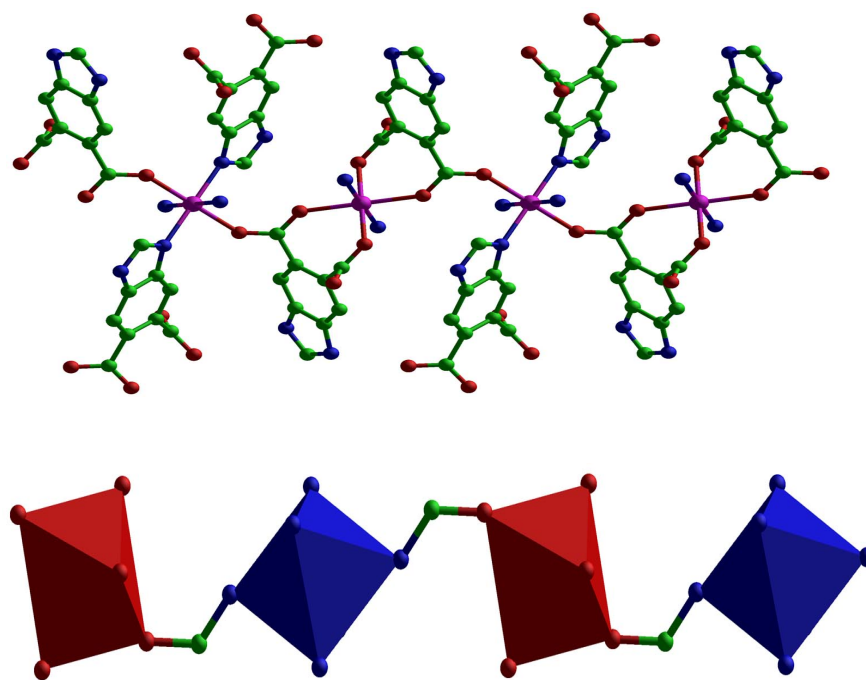

**Figure S3.** View of the 1D [Co(Hbidc)]<sub>n</sub> zigzag chain in **1**.

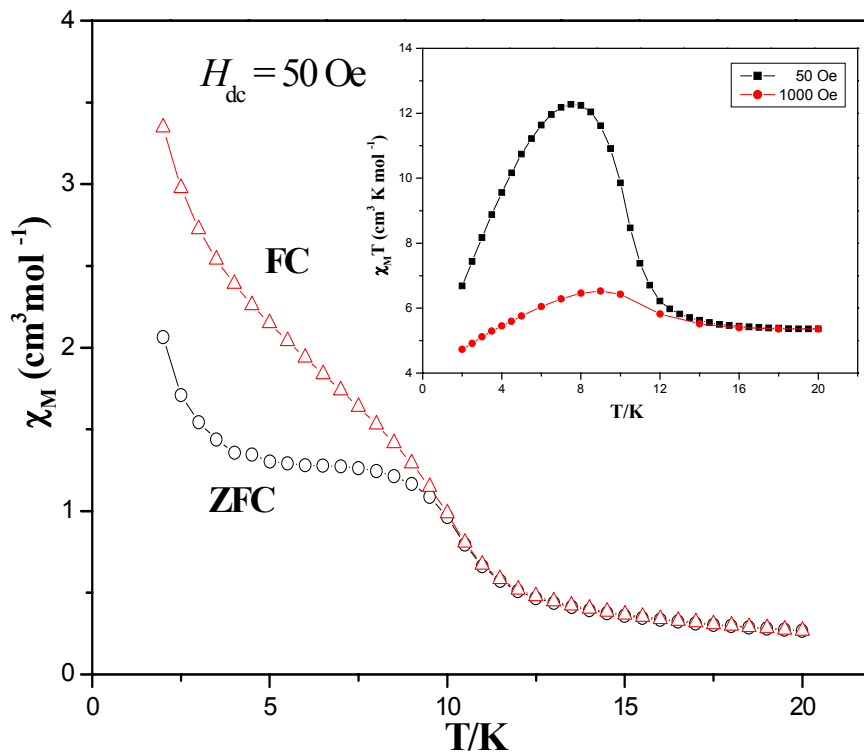

**Figure S4.** Field-cooled (FC) and zero-field-cooled (ZFC) magnetization for 1. The inset is the plots of  $\chi_M T$  vs.  $T$  at various fields.
